# Supplementary material
Source: HighWire-hosted journal article supplement (https://ard.bmj.com/content/78/1/51)
Supplement: inline-supplementary-material-6 [file inline-supplementary-material-6.docx]

**JADAS-10 score**

The JADAS-10 score is the linear sum of 4 components, which yields a global score of 0-40(1).

1 PGA 0-10cm

2 Parent/patient Global Assessment 0-10cm

3 Active joint count up to max of 10 joints, any involved joint, irrespective of its type.

4 Normalized ESR according to formula: (ESR(mm/hour)-20)/10; before the calculation, ESR values<20 are converted to 0 and ESR values>120 are converted to 120.

**JADAS Minimal disease activity definition(2)**

For Oligoarticular JIA: JADAS10 < 2

For Polyarticular JIA: JADAS10 < 3.8

**JADAS Inactive disease definition**

For oligo and polyarticular JIA: JADAS10 ≤ 1

1. Consolaro A, Ruperto N, Bazso A, Pistorio A, Magni-Manzoni S, Filocamo G, et al. Development and validation of a composite disease activity score for juvenile idiopathic arthritis. Arthritis Rheum. 2009;61(5):658-66.

2. Consolaro A, Bracciolini G, Ruperto N, Pistorio A, Magni-Manzoni S, Malattia C, et al. Remission, minimal disease activity, and acceptable symptom state in juvenile idiopathic arthritis: defining criteria based on the juvenile arthritis disease activity score. Arthritis Rheum. 2012;64(7):2366-74.
