# Supplementary material
Source: HighWire-hosted journal article supplement (https://ard.bmj.com/content/78/1/51)
Supplement: inline-supplementary-material-10 [file inline-supplementary-material-10.docx]

Supplementary file 7 Heat map representing active or inactive disease in arm 1, 2 and 3 for individual patients

Arm 1 initial sequential monotherapy

Arm 2 Initial MTX and prednisolone

Arm 3 Initial etanercept and MTX
